# Supplementary material for: Nitrogen and sulfur co-doped Ti3C2Tx MXenes for high-rate lithium-ion batteries
Source: Royal Society of Chemistry journal article supplement (doi:10.1039/d2cp05962b), 2023-01-01
Supplement: d2cp05962b1.pdf [file d2cp05962b1.pdf]

## Supporting Information

### Nitrogen and Sulfur Co-Doped $Ti_3C_2T_x$ MXene for High-Rate Lithium-Ion Batteries

Renfei Cheng<sup>a,b</sup>, Tao Hu<sup>c</sup>, Jinxing Yang<sup>a, b</sup>, Zuohua Wang<sup>d</sup>, Weizhen Wang<sup>a</sup>, Yan Liang<sup>a</sup>, Zhiqing Yang<sup>a</sup>, Hongwang Zhang<sup>d</sup>, Xiaohui Wang<sup>a,\*</sup>

<sup>a</sup> Shenyang National Laboratory for Materials Science, Institute of Metal Research, Chinese Academy of Sciences, Shenyang 110016, China

<sup>b</sup> School of Materials Science and Engineering, University of Science and Technology of China, Shenyang 110016, China

<sup>c</sup> Institute of Materials Science and Devices, Suzhou University of Science and Technology, Suzhou 215009, China

<sup>d</sup> National Engineering Research Center for Equipment and Technology of Cold Strip Rolling, College of Mechanical Engineering, Yanshan University, Qinhuangdao 066004, China

\* Corresponding author,

E-mail address: wang@imr.ac.cn (X.H. Wang)

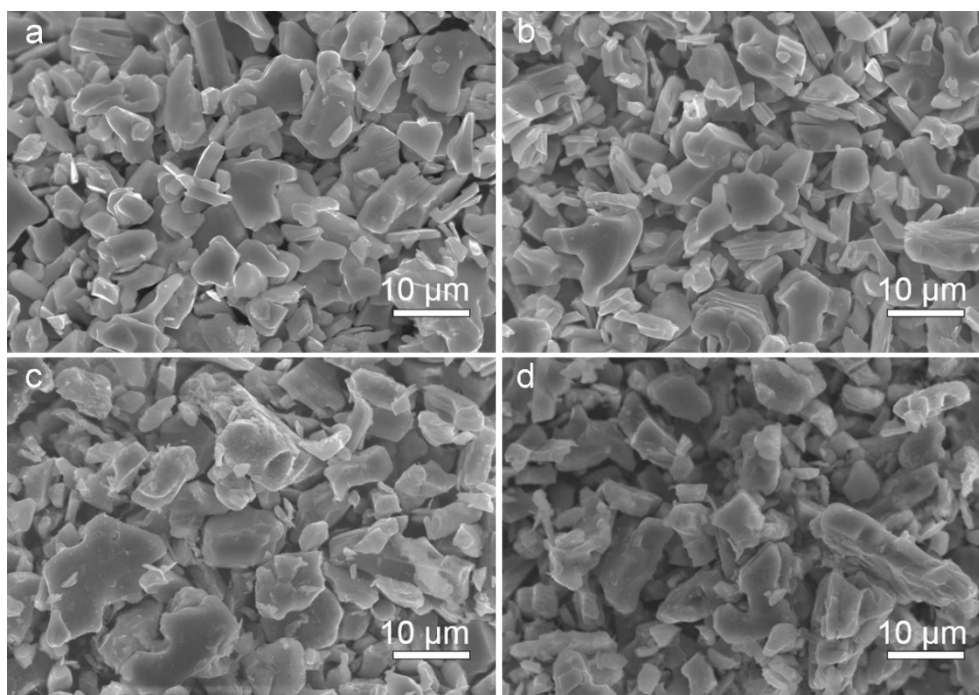

**Fig. S1** SEM images of (a)  $\text{Ti}_3\text{C}_2\text{T}_x$ , (b)  $\text{N-Ti}_3\text{C}_2\text{T}_x$ , (c)  $\text{NS}_{0.1}\text{-Ti}_3\text{C}_2\text{T}_x$ , and (d)  $\text{NS}_{0.5}\text{-Ti}_3\text{C}_2\text{T}_x$ .

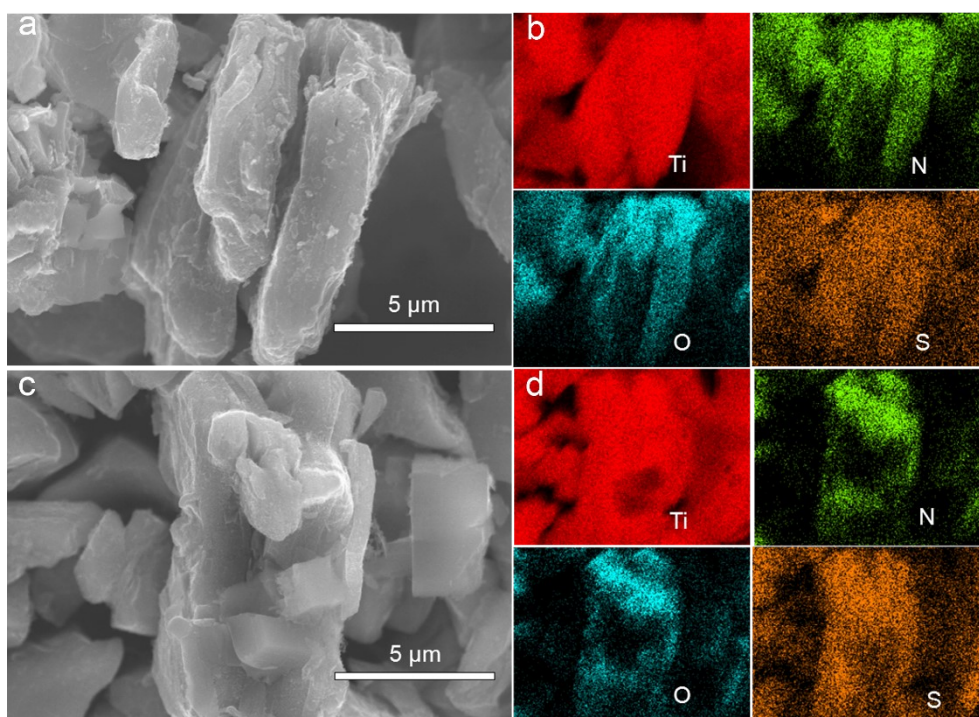

**Fig. S2** (a)  $\text{NS}_{0.1}\text{-Ti}_3\text{C}_2\text{T}_x$ , corresponding elemental mapping images (b) for the distribution of Ti, N, O and S elements, respectively. (c)  $\text{NS}_{0.5}\text{-Ti}_3\text{C}_2\text{T}_x$ , corresponding elemental mapping images (d) for the distribution of Ti, C, O and S elements, respectively.

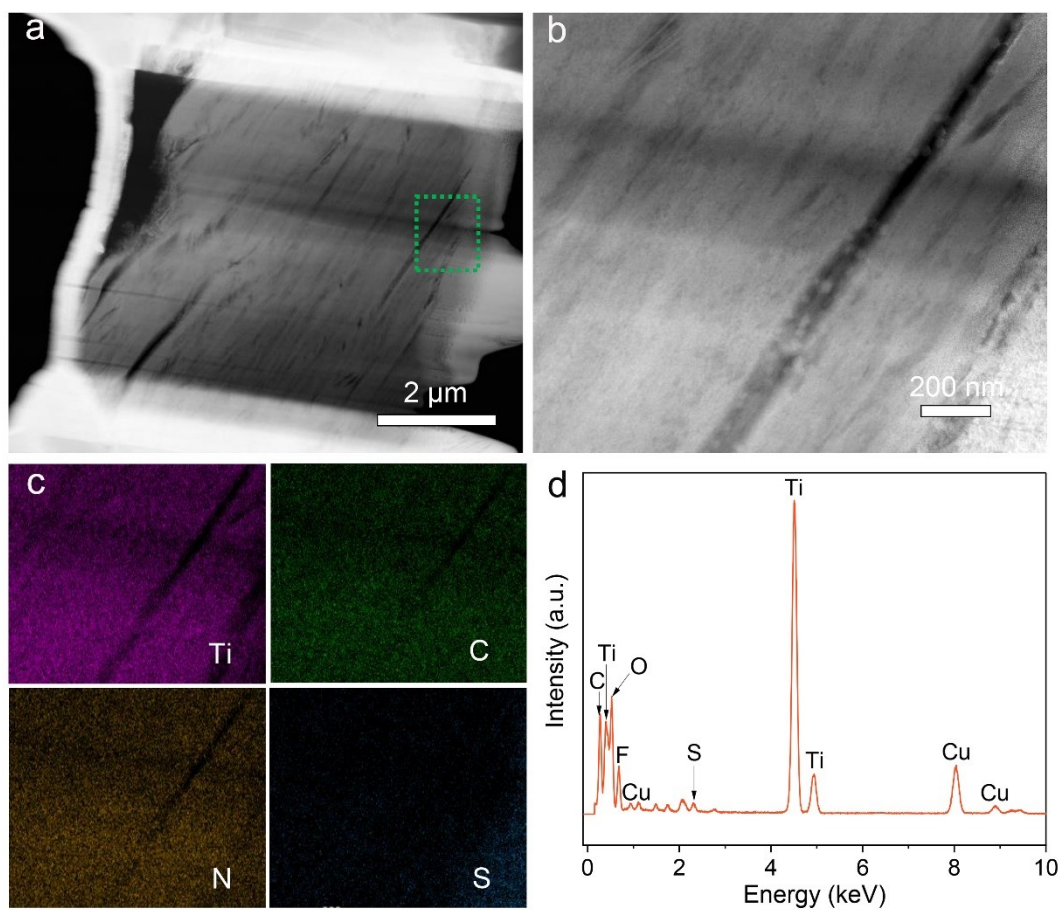

**Fig. S3** Typical STEM image and EDS mapping of  $\text{NS}_{0.3}\text{-Ti}_3\text{C}_2\text{T}_x$ . (a) Cross sectional microstructure of  $\text{NS}_{0.3}\text{-Ti}_3\text{C}_2\text{T}_x$ . (b) HAADF image of marked area by green rectangular and (c) corresponding elemental mappings of Ti, C, N, and S elements. (d) STEM-EDS spectrum of  $\text{NS}_{0.3}\text{-Ti}_3\text{C}_2\text{T}_x$ . The atomic ratios of elements are listed in Table S1.

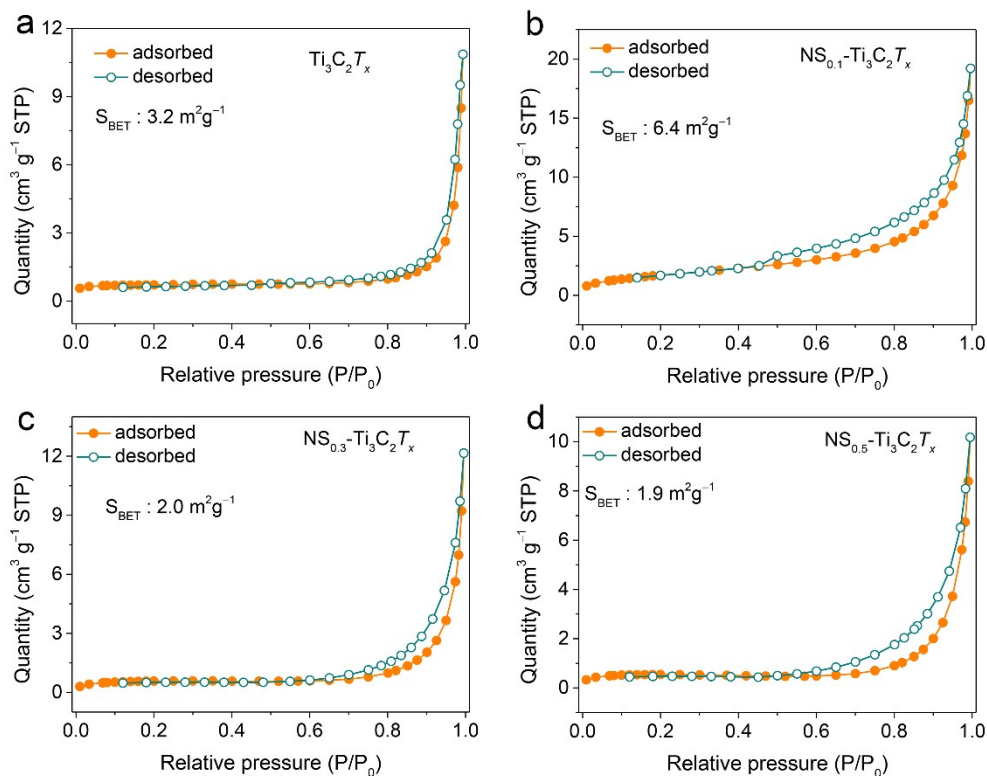

**Fig. S4** Nitrogen adsorption/desorption isotherms of (a) pristine  $\text{Ti}_3\text{C}_2\text{T}_x$ , (b)  $\text{NS}_{0.1}\text{-Ti}_3\text{C}_2\text{T}_x$ , (c)  $\text{NS}_{0.3}\text{-Ti}_3\text{C}_2\text{T}_x$  and (d)  $\text{NS}_{0.5}\text{-Ti}_3\text{C}_2\text{T}_x$ . The BET specific surface areas of aforementioned samples are 3.2, 6.4, 2.0 and 1.9  $\text{m}^2 \text{g}^{-1}$ , respectively.

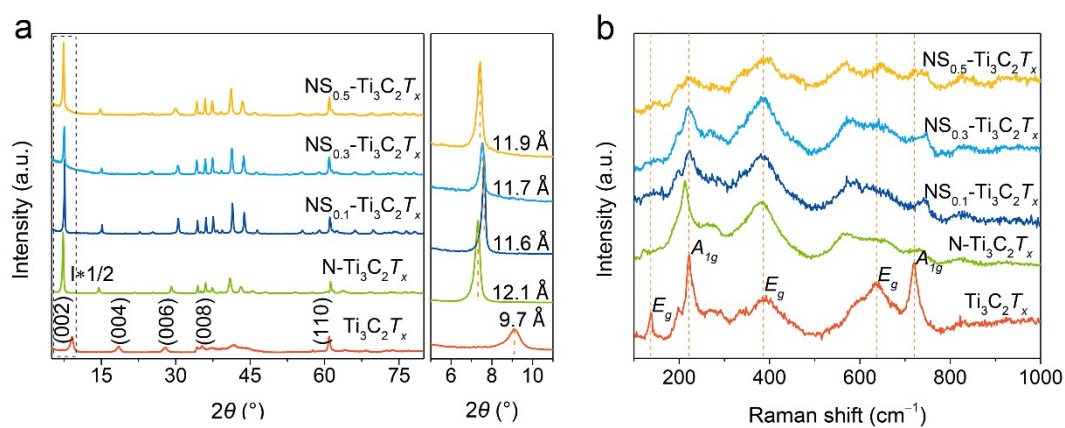

**Fig. S5** (a) XRD patterns and (b) Raman spectra of pristine  $\text{Ti}_3\text{C}_2\text{T}_x$  and N, S co-doped  $\text{Ti}_3\text{C}_2\text{T}_x$ .



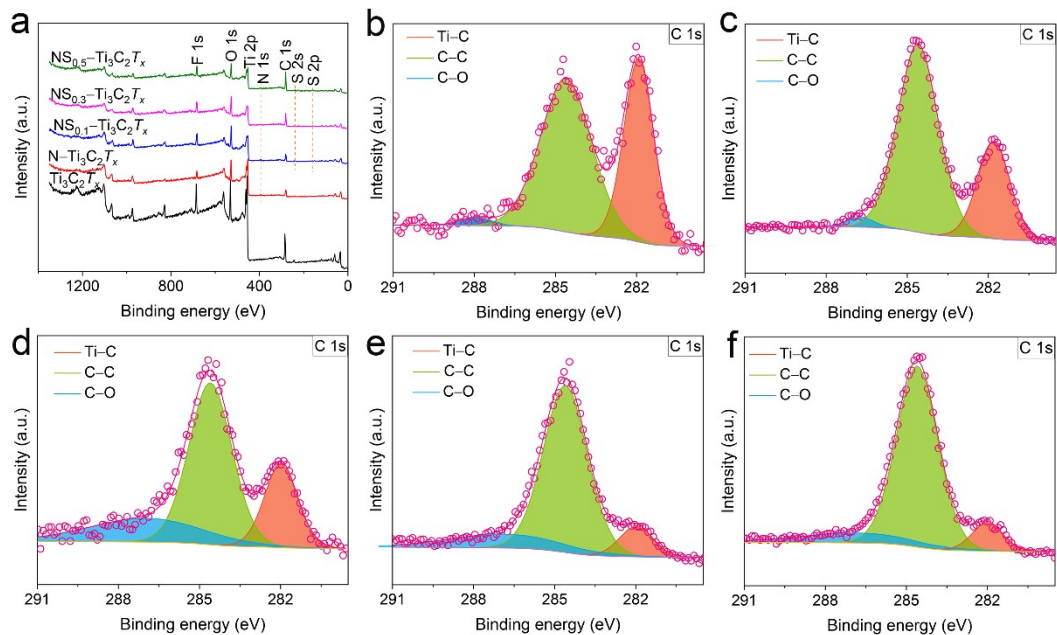

**Fig. S6** (a) XPS survey spectra of pristine  $\text{Ti}_3\text{C}_2\text{T}_x$ ,  $\text{N-Ti}_3\text{C}_2\text{T}_x$ ,  $\text{NS}_{0.1}\text{-Ti}_3\text{C}_2\text{T}_x$ ,  $\text{NS}_{0.3}\text{-Ti}_3\text{C}_2\text{T}_x$ , and  $\text{NS}_{0.5}\text{-Ti}_3\text{C}_2\text{T}_x$ . High-resolution C 1s XPS spectra of (b)  $\text{Ti}_3\text{C}_2\text{T}_x$ , (c)  $\text{N-Ti}_3\text{C}_2\text{T}_x$ , (d)  $\text{NS}_{0.1}\text{-Ti}_3\text{C}_2\text{T}_x$ , (e)  $\text{NS}_{0.3}\text{-Ti}_3\text{C}_2\text{T}_x$ , and (f)  $\text{NS}_{0.5}\text{-Ti}_3\text{C}_2\text{T}_x$ . The XPS spectra were recorded after Ar sputtering for 120 s.

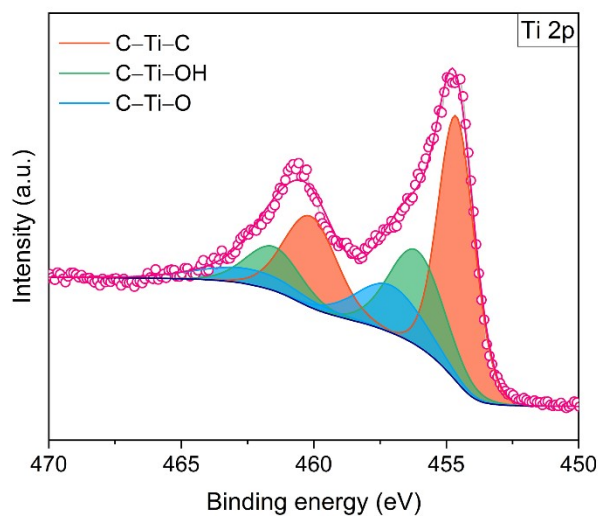

**Fig. S7** High-resolution Ti 2p XPS spectra of pristine  $\text{Ti}_3\text{C}_2\text{T}_x$ . The XPS spectra were recorded after Ar sputtering for 120 s.

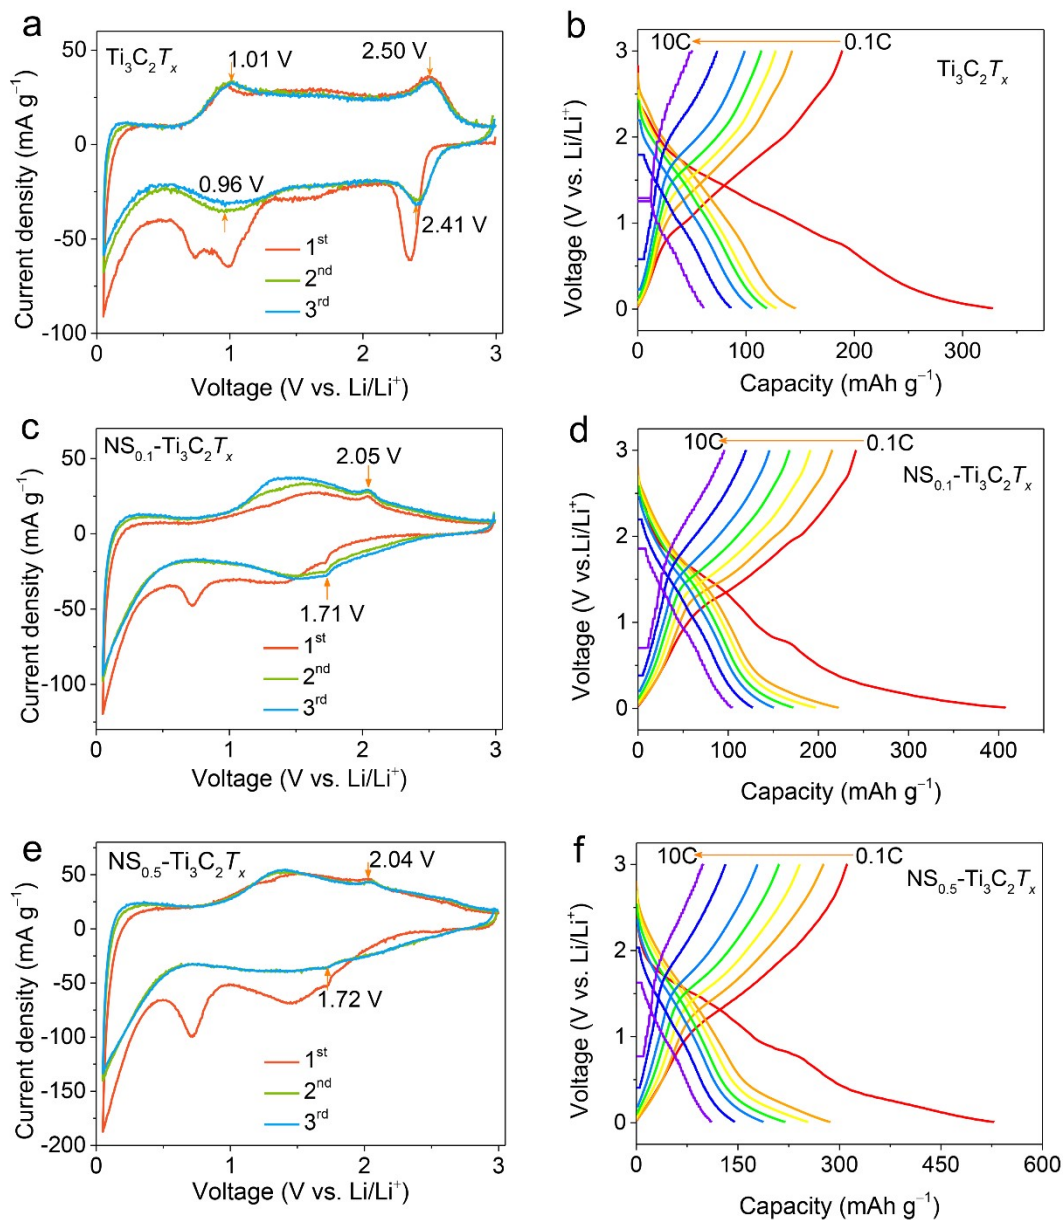

**Fig. S8** CV curves of (a) pristine Ti<sub>3</sub>C<sub>2</sub>T<sub>x</sub>, (c) NS<sub>0.1</sub>-Ti<sub>3</sub>C<sub>2</sub>T<sub>x</sub>, (e) NS<sub>0.5</sub>-Ti<sub>3</sub>C<sub>2</sub>T<sub>x</sub> electrodes. Galvanostatic charge and discharge curves of (b) N-Ti<sub>3</sub>C<sub>2</sub>T<sub>x</sub>, (d) NS<sub>0.1</sub>-Ti<sub>3</sub>C<sub>2</sub>T<sub>x</sub> and (f) NS<sub>0.5</sub>-Ti<sub>3</sub>C<sub>2</sub>T<sub>x</sub> cycled at various rates.

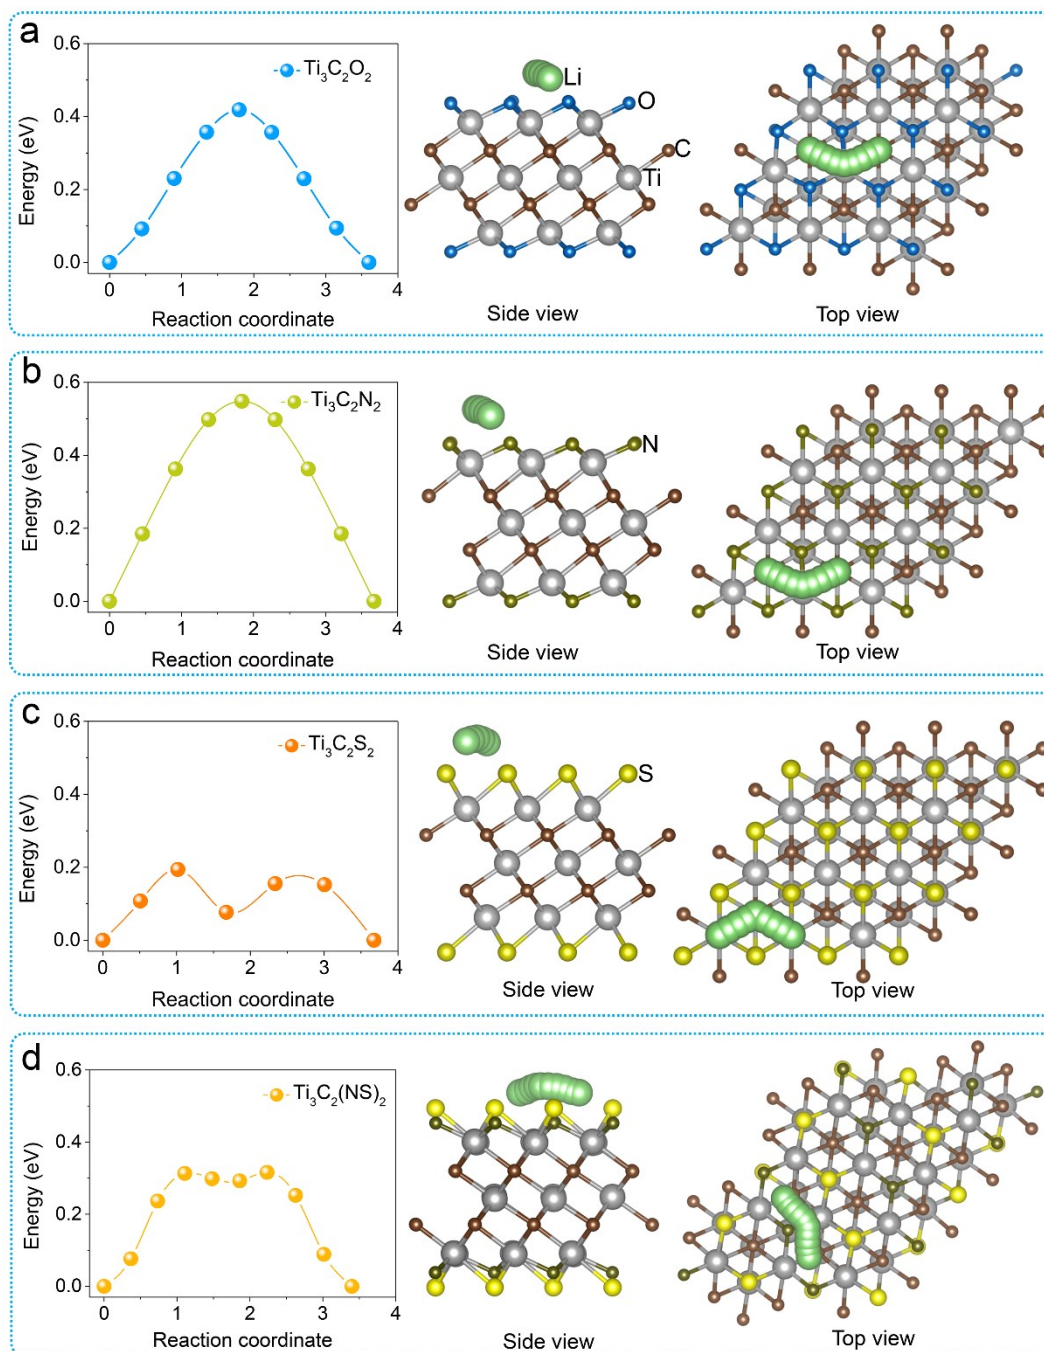

**Fig. S9** Diffusion barrier profiles of Li on (a)  $\text{Ti}_3\text{C}_2\text{O}_2$ , (b)  $\text{Ti}_3\text{C}_2\text{N}_2$ , (c)  $\text{Ti}_3\text{C}_2\text{S}_2$  and (d)  $\text{Ti}_3\text{C}_2(\text{NS})_2$  and the corresponding energetically optimized Li migration pathways from side and top view.

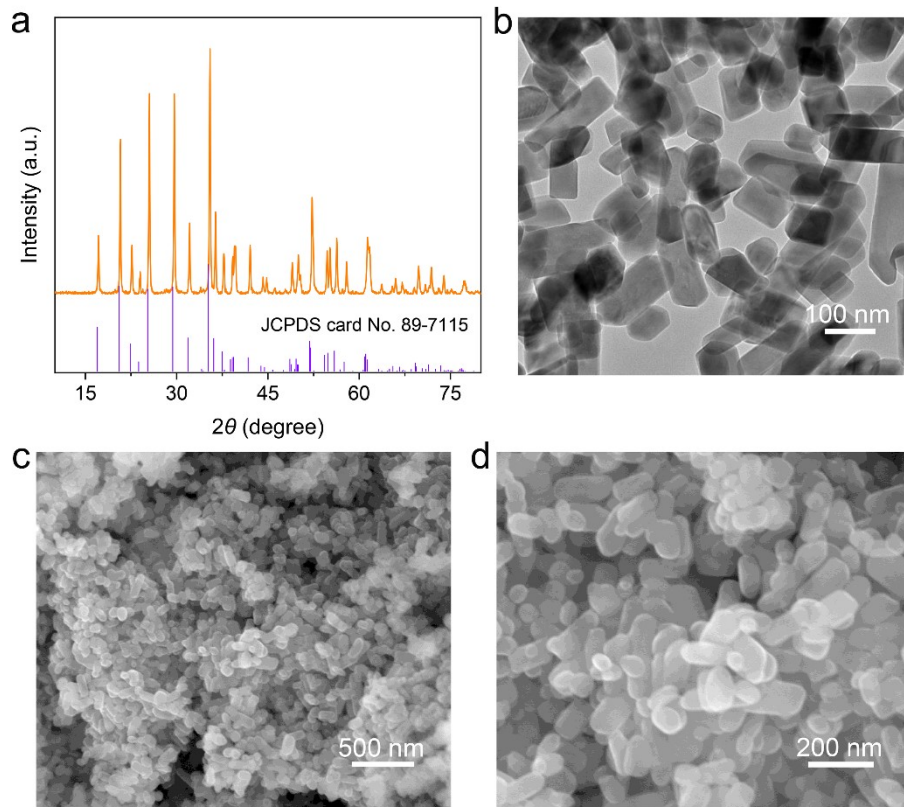

**Fig. S10** XRD pattern of the as-prepared  $\text{LiMn}_{0.5}\text{Fe}_{0.5}\text{PO}_4$  product. TEM image (b), and SEM images (c, d) of  $\text{LiMn}_{0.5}\text{Fe}_{0.5}\text{PO}_4/\text{C}$  material.

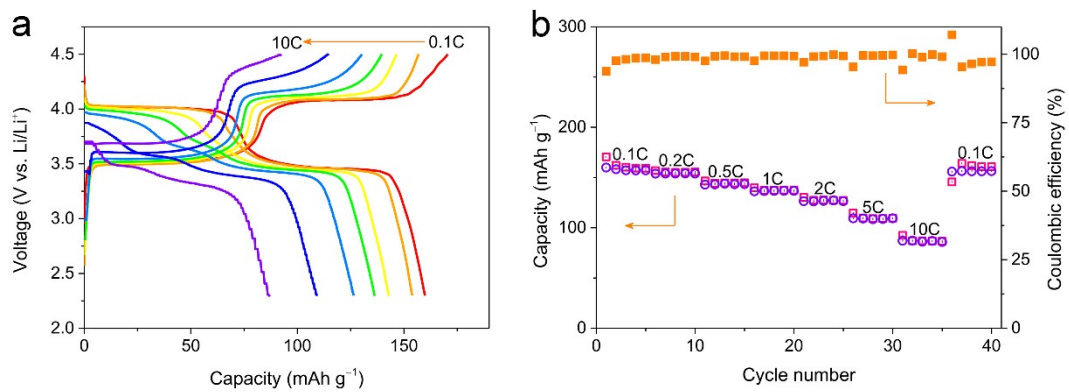

**Fig. S11** (a) Typical charge/discharge curves of  $\text{LiMn}_{0.5}\text{Fe}_{0.5}\text{PO}_4/\text{C}$  at current rates ranging from 0.1 to 10C. (b) Rate capability.



**Table S1** Summary of atomic ratio in the  $\text{NS}_{0.3}\text{-Ti}_3\text{C}_2\text{T}_x$ .

| $\text{NS}_{0.3}\text{-Ti}_3\text{C}_2\text{T}_x$<br>$x$ | Element |       |      |      |      |      |       |      |
|----------------------------------------------------------|---------|-------|------|------|------|------|-------|------|
|                                                          | C       | O     | F    | Al   | Si   | S    | Ti    | Cu   |
| Subsurface                                               | 25.22   | 13.59 | 5.02 | 0.68 | 0.35 | 1.11 | 45.36 | 8.67 |
| Interior                                                 | 20.58   | 11.99 | 5.16 | 0.56 | 0.42 | 0.70 | 51.27 | 9.31 |

**Table S2** Atomic concentration of elements in surface layers of pristine- $\text{Ti}_3\text{C}_2\text{T}_x$ ,  $\text{N-Ti}_3\text{C}_2\text{T}_x$ ,  $\text{NS}_{0.1}\text{-Ti}_3\text{C}_2\text{T}_x$ ,  $\text{NS}_{0.3}\text{-Ti}_3\text{C}_2\text{T}_x$ , and  $\text{NS}_{0.5}\text{-Ti}_3\text{C}_2\text{T}_x$  samples.

| Sample                                            | Element |      |      |      |     |     |     |
|---------------------------------------------------|---------|------|------|------|-----|-----|-----|
|                                                   | Ti      | O    | C    | F    | Al  | N   | S   |
| pristine- $\text{Ti}_3\text{C}_2\text{T}_x$       | 19.0    | 21.3 | 36.0 | 14.4 | 9.3 | -   | -   |
| $\text{N-Ti}_3\text{C}_2\text{T}_x$               | 27.2    | 25.1 | 32.1 | 7.4  | 5.2 | 3.0 | -   |
| $\text{NS}_{0.1}\text{-Ti}_3\text{C}_2\text{T}_x$ | 10.9    | 17.4 | 52.6 | 8.2  | 6.9 | 2.5 | 1.5 |
| $\text{NS}_{0.3}\text{-Ti}_3\text{C}_2\text{T}_x$ | 12.0    | 16.7 | 55.3 | 7.8  | 3.4 | 2.0 | 2.9 |
| $\text{NS}_{0.5}\text{-Ti}_3\text{C}_2\text{T}_x$ | 11.1    | 15.3 | 54.2 | 9.6  | 3.5 | 3.5 | 2.8 |

**Table S3** Ti 2p core level peak analyses of  $\text{Ti}_3\text{C}_2\text{T}_x$  MXenes after  $\text{Ar}^+$  sputtering 120 s. The Ti 2p core level was fitted with a fixed area ratio of 2:1 for all Ti  $2p_{3/2}\text{-Ti}2p_{1/2}$  and doublet separation of 5.5 eV for C-Ti-C, C-Ti-OH, C-Ti-O, C-Ti-S, C-Ti-N, and C-Ti-ON.

| Sample                                            | Fraction / % |             |             |             |               |             |
|---------------------------------------------------|--------------|-------------|-------------|-------------|---------------|-------------|
|                                                   | C-Ti-C       | C-Ti-N      | C-Ti-OH     | C-Ti-S      | C-Ti-O        | C-Ti-ON     |
|                                                   | 454.9±0.1eV  | 455.5±0.1eV | 456.3±0.1eV | 457.0±0.1eV | 457.2eV±0.1eV | 458.2±0.1eV |
| pristine- $\text{Ti}_3\text{C}_2\text{T}_x$       |              | -           | 28.6        |             |               | -           |
| $x$                                               | 53.6         |             |             | -           | 17.8          |             |
| $\text{N-Ti}_3\text{C}_2\text{T}_x$               | 40           | 5.0         | -           | -           | 50            | 5.0         |
| $\text{NS}_{0.1}\text{-Ti}_3\text{C}_2\text{T}_x$ | 42.3         | 6.3         | -           | 4.2         | 40.9          | 6.3         |
| $\text{NS}_{0.3}\text{-Ti}_3\text{C}_2\text{T}_x$ | 41.5         | 1.2         | -           | 5.0         | 49.8          | 2.5         |
| $\text{NS}_{0.5}\text{-Ti}_3\text{C}_2\text{T}_x$ | 45.2         | 3.1         | -           | 6.2         | 42.4          | 3.1         |

**Table S4.** Comparison of the volume expansion for  $\text{NS}_{0.3}\text{-Ti}_3\text{C}_2\text{T}_x$  in our work with widely reported electrode materials.

| Samples                                           | Volume expansion (%) | Reference          |
|---------------------------------------------------|----------------------|--------------------|
| $\text{NS}_{0.3}\text{-Ti}_3\text{C}_2\text{T}_x$ | 0.6                  | This work          |
| $\text{LiCoO}_2$                                  | 1.8                  | Ref. <sup>1</sup>  |
| $\text{VPO}_4$                                    | 2.1                  | Ref. <sup>2</sup>  |
| NCM111                                            | 1.2                  | Ref. <sup>3</sup>  |
| $\text{Nb}_2\text{CT}_x$                          | 2.3                  | Ref. <sup>4</sup>  |
| $\text{LiFePO}_4$                                 | 6.8                  | Ref. <sup>5</sup>  |
| $\text{VO}_2$                                     | 6.0                  | Ref. <sup>6</sup>  |
| $\text{LiMn}_2\text{O}_4$                         | 16                   | Ref. <sup>7</sup>  |
| $\text{Li}_4\text{Ti}_5\text{O}_{12}$             | 0.8                  | Ref. <sup>8</sup>  |
| Graphite                                          | 10.7                 | Ref. <sup>9</sup>  |
| $\text{TiO}_2$                                    | 3.7                  | Ref. <sup>10</sup> |

## References

- 1 G. G. Amatucci, J. M. Tarascon, L. C. Klein, *J. Electrochem. Soc.* 1996, **143**, 1114.
- 2 S. S. Fedotov, A. S. Samarin,; V. A. Nikitina, K. J. Stevenson, A. M. Abakumov, E. V. *ACS Appl. Mater. Interfaces*, 2019, **11**, 12431-12440.
- 3 A. O. Kondrakov, A. Schmidt, J. Xu, H. Geßwein, R. Mönig, P. Hartmann, H. Sommer, T. Brezesinski, J. Janek, *J. Phys. Chem. C*, 2017, **121**, 3286-3294.
- 4 R. Cheng, T. Hu, Z. Wang, J. Yang, R. Dai, W. Wang, C. Cui, Y. Liang, C. Zhang, C. Li, H. Wang, H. Lu, Z. Yang, H. Zhang, X. Wang, *Phys. Chem. Chem. Phys.*, 2021, **23**, 23173-23183.
- 5 H. Liu, C. Li, H. P. Zhang, L. J. Fu, Y. P. Wu, H. Q. Wu, *J. Power Sources*, 2006, **159**, 717-720.
- 6 Q.Liu, G. Tan, P. Wang, S. C. Abeyweera, D. Zhang, Y. Rong, Y. A. Wu, J. Lu, C.-J. Sun, Y. Ren, Y. Liu, R. T. Muehleisen, L. B. Guzowski, J. Li, X. Xiao, Y. Sun, *Nano Energy*, 2017, **36**, 197-205.
- 7 M. M. Thackeray, *J. Electrochem. Soc.*, 1995, **142**, 2558-2563.
- 8 P. C. Tsai, W. D. Hsu, S. K. Lin, *J. Electrochem. Soc.*, 2014, **161**, A439.
- 9 M. Winter, J. O. Besenhard, M. E. Spahr, P. Novák, *Adv. Mater.*, 1998, **10**, 725-763.
- 10 X. Zhang, V. Aravindan, P. S. Kumar, H. Liu, J. Sundaramurthy, S. Ramakrishna, S. Madhavi, *Nanoscale* 2013, **5**, 5973-5980.
